# Supplementary material for: Surface functionalization-specific binding of coagulation factors by zinc oxide nanoparticles delays coagulation time and reduces thrombin generation potential in vitro
Source: PubMed Central journal article supplement (PMC5517067; doi:10.1371/journal.pone.0181634), 2017-07-19
Supplement: pone.0181634.s001.pdf [file pone.0181634.s001.pdf]

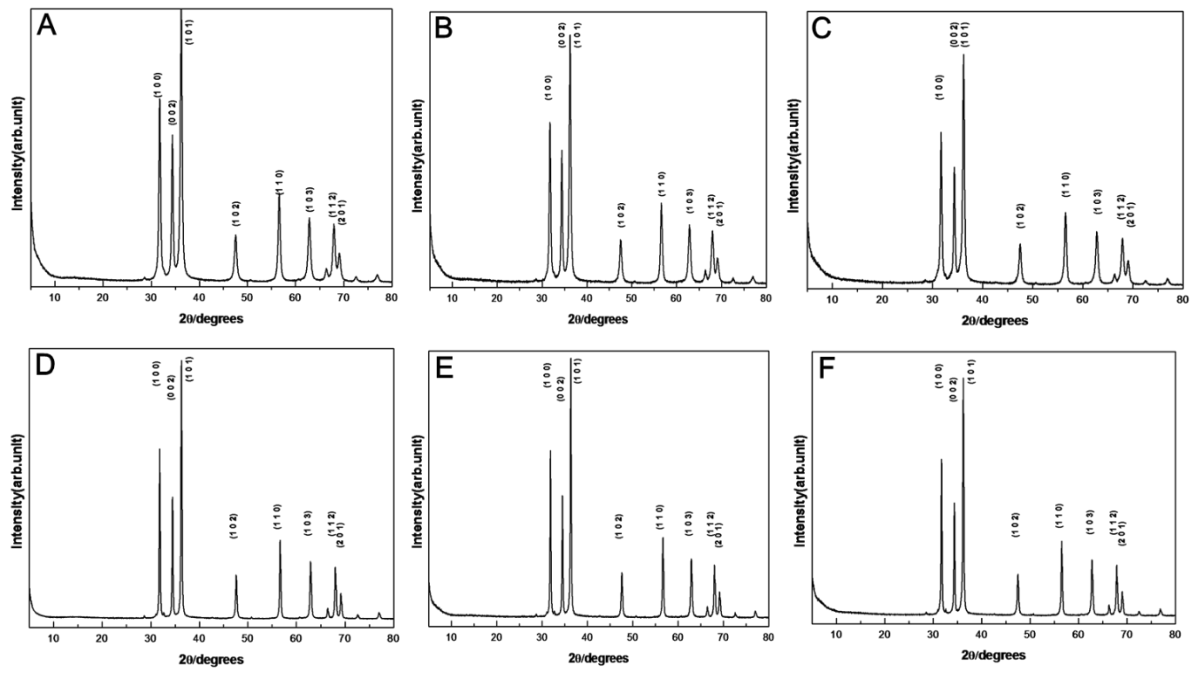

**S1 Fig. X-ray diffraction patterns of the ZnO NPs.** (A) Pristine 20 nm, (B) Citrate 20 nm, (C) L-serine 20 nm, (D) Pristine 100 nm, (E) Citrate 100 nm, and (F) L-serine 100 nm.
